# Supplementary material for: Comparative Genomics of Mycoplasma: Analysis of Conserved Essential Genes and Diversity of the Pan-Genome
Source: PLoS One. 2012 Apr 20;7(4):e35698. doi: 10.1371/journal.pone.0035698 (PMC3335003; doi:10.1371/journal.pone.0035698)
Supplement: Table S3 — Genes under Positive Selection in the Human-infecting Lineage. (XLS) [file pone.0035698.s004.xls]

## Sheet: Sheet1
Table S3. Genes under positive selection in human-infect lineage
Lineage	Gene	dN/dS a	% sequence	COG(s)	Product
MG Lineage	MGA_0778	310.438	0.119	COG0178L	excinuclease ABC subunit A UvrA
	MGA_0670	12.096	0.106	COG0653U	protein translocase subunit secA
	MGA_0652	672.018	0.166	COG0595R	hydrolase
	MGA_1005	455.1	0.102	COG0086K	DNA-directed RNA polymerase subunit beta'
	MGA_1010	455.1	0.102	COG0086K	DNA-directed RNA polymerase subunit beta'
	MGA_0085	1.373	0.061	COG0569P	Trk system potassium uptake proteinTrkA
	MGA_0818	3.21	0.39	COG0195K	transcription elongation factor NusA
	MGA_0206	10000	0.328	COG0513LKJ	SrmB-like ATP-dependent RNA helicase
	MGA_0358	722.42	0.209	COG1109G	Phosphomannomutase
	MGA_0931	455.231	0.298	COG0510M	putative choline kinase
	MGA_0599	307.148	0.247	COG1493T	HPr kinase/phosphorylase
	MGA_0087	930.33	0.161	COG0495J	leucyl-tRNA synthetase
	MGA_0925	20.529	0.241	COG0441J	threonyl-tRNA synthetase
MP Lineage	MYPE10110	35.546	0.095	COG0197J	ribosomal protein L16
	MYPE800	160.435	0.073	COG0086K	DNA-directed RNA polymerase subunit beta'
	MYPE4830	4.89	0.208	COG1196D	structural maintenance of chromosomes SMC superfamily proteins
MGP Lineage	MG_305	239.564	0.069	COG0443O	molecular chaperone DnaK
	MG_466	8934.38	0.288	COG0230J	50S ribosomal protein L34
	MG_430	136.777	0.106	COG0696G	phosphoglyceromutase
	MG_139	2266.27	0.16	COG0595R	metallo-beta-lactamase superfamily protein
	MG_443	2689.88	0.193	COG1284S	hypothetical protein
	MG_366	10000	0.415	-	hypothetical protein
	MG_470	443.38	0.124	COG1192D	CobQ/CobB/MinD/ParA nucleotide binding domain-containing protein
	MG_004	237.198	0.136	COG0188L	DNA gyrase subunit A
Common Ancesterb	MYPE9450	172.126	0.128	COG0462FE	phosphoribosylpyrophosphate synthetase
	MYPE420	10000	0.1	COG0525J	valyl-tRNA synthetase
	MYPE1930	10000	0.1	COG0536R	GTP-binding protein Obg
	MYPE8540	10000	0.127	COG0013J	alanyl-tRNA synthetase
aRatio of nonsynonymous to synonomous mutation rate (dN/dS) measures the strength of selection, where values > 1 indicate
positive selection, and larger values indicate stronger selection.
bIn common ancester lineage: single gene of M.penetrans HF-2 was used to represent each ortholog group (see Table S1)
genes of M.genitalium G37, M.pneumoniae M129 and M.gallisepticum str. R(low) in the same ortholog group are also
under positive selection.
